# Supplementary material for: Genome-Wide Association Mapping and Genomic Prediction Analyses Reveal the Genetic Architecture of Grain Yield and Flowering Time Under Drought and Heat Stress Conditions in Maize
Source: Front Plant Sci. 2019 Jan 30;9:1919. doi: 10.3389/fpls.2018.01919 (PMC6363715; doi:10.3389/fpls.2018.01919)
Supplement: TABLE S3 — The haplotype-based genome-wide association mapping results of the 12 target trait-environment combinations in the DTMA panel. [file Table_3.xlsx]

## Sheet: Table
	Table S3 Summary of the results of haplotyped-based GWAS in DTMA panel for grain yield, anthesis date, and anthesis-silking interval under different conditions.
Trait	Candidate Gene	Chromosome	Position	P.value	R2 (%)	Annotation	Shared SNP Associated-Trait	Letters	Numeric	No.Type	No. SNPs-selected	No. SNPs-total
GY-WW	GRMZM2G089400	6	89066995	9.68065e-05	11.7311	Bifunctional inhibitor/lipid-transfer protein/seed storage 2S albumin superfamily protein		TCACC/TCAYC/CCATC/TCATC/YSAYC/CGATC/TCGCC/CCATY/YSATY/CSATY/YCATY/YSRYC/CGATT/CCGTC/CCACC/YCATC/TCATT/YSAYY/YSATT/YCRYY/YCRYC/YCAYC/YGATC/CCATT/TGATC/TCGCT	1/2/3/4/5/6/7/8/9/10/11/12/13/14/15/16/17/18/19/20/21/22/23/24/25/26	26	5	5
GY-WW	GRMZM2G044469	7	7411585	6.5182e-06	14.4512	Aldehyde oxidase 1		CCCCG/CCCCA/SYMAA/GCAAA/CTCAA/GCACA/GCAAR/SCMCA/GCCCA/SCMMR/SYMCA/CCCAA/CTCCA/GCAMA/CYCMR/SCMCR/CCCMR/GCAMR/SCMMA/SYMMA	1/2/3/4/5/6/7/8/9/10/11/12/13/14/15/16/17/18/19/20	20	5	8
GY-DS	GRMZM2G307152	3	170423758	6.51457e-05	9.01352	Integrase-type DNA-binding superfamily protein		CCG/CGG/TGA/YSR/TGG/YGA/TGR/YGR/YSA/YSG/YGG	1/2/3/4/5/6/7/8/9/10/11	11	3	3
GY-DS	GRMZM2G023836	6	142825626	3.11317e-05	9.29928	Protein kinase superfamily protein		CGA/CCA/CSA/CGT/CCT/YSA/TCT/CSW/YCW/TCA/CGW	1/2/3/4/5/6/7/8/9/10/11	11	3	3
GY-DH	GRMZM2G117989	4	9658456	4.53709e-05	10.0331	Pathogenesis-related 4		AG/GG/RG/AC/AS/RC	1/2/3/4/5/6	6	2	2
AD-WW	GRMZM2G313009	1	72012034	8.48064e-05	11.7873	Heavy metal transport/detoxification superfamily protein	AD.WW	AACCC/TACCC/TACCG/WATGG/AATGG/AAYSS/TATGG/AGTGG/ARYSS/AGCCC/WACCC/WAYSS/ARCCC/WGCCS/TGCCC	1/2/3/4/5/6/7/8/9/10/11/12/13/14/15	15	5	12
AD-WW	GRMZM2G109651	8	62989736	3.29239e-05	10.2962	Cyclin/Brf1-like TBP-binding protein	AD.DHS	AGGCC/TAAGT/AARCY/AAACT/AAAGT/AAGGC/TAAGC/WRRSY/WAAST/TAGCC/WRRCY/WAGCC/WAAGT/WRAGC/TAGCT/AARSY/TAAGY/AAGGT/WRGCC	1/2/3/4/5/6/7/8/9/10/11/12/13/14/15/16/17/18/19	19	5	11
AD-DS	AC233853.1_FG002	3	3821820	6.2032e-05	9.28669	Basic-leucine zipper (bZIP) transcription factor family protein		GGCGA/CCCGG/SSCGR/CCACA/SSMSA/GGCGG/CCCGA/CCCGR/SSCGA/GGMGA/CCMSR/SSCGG/GGCGR	1/2/3/4/5/6/7/8/9/10/11/12/13	13	5	6
AD-DS	GRMZM2G406951	3	166597404	7.16895e-05	15.3821	Alpha/beta-Hydrolases superfamily protein		GGGGG/GCKGC/GCGGS/GCTGC/GCGCC/GGGGC/GSKSC/GCGGC/GSTSS/GSKSS/SSKGC/CGTCC/CCGGC/SCKGC/CGGGC/GCKGS/GCTGG/GGTCC/GCGGG/GSKGC/GSGGC/CGTGC/GCTCG/SSGGC/GGTGC/GGKGS	1/2/3/4/5/6/7/8/9/10/11/12/13/14/15/16/17/18/19/20/21/22/23/24/25/26	26	5	13
AD-DS	GRMZM2G109651	8	62989736	2.69088e-05	10.5504	Cyclin/Brf1-like TBP-binding protein	AD.DHS	AGGCC/TAAGT/AARCY/AAACT/AAAGT/AAGGC/TAAGC/WRRSY/WAAST/TAGCC/WRRCY/WAGCC/WAAGT/WRAGC/TAGCT/AARSY/TAAGY/AAGGT/WRGCC	1/2/3/4/5/6/7/8/9/10/11/12/13/14/15/16/17/18/19	19	5	11
AD-DS	GRMZM2G027420	8	67355330	3.17722e-05	10.1884			TGTTC/TGCCC/TGTCC/TGYCC/YGTCC/CACCT/TGTYC/YRYCY/YRCCY/YRTYY/TGYYC/YGCCC/TGYYY/CAYCT	1/2/3/4/5/6/7/8/9/10/11/12/13/14	14	5	5
AD-DS	GRMZM2G043764	8	67723054	6.90903e-05	9.13387	ABI five binding protein 3	AD.DS	TCGGA/ATATG/AYRKR/TCAGG/TCGGR/TCRGA/AYAKR/TCAGA/WYRKR/TTATG/ATGGA/TCGKR/AYGKR/TYAKG/WCAKR/TYRKR/ACAGA	1/2/3/4/5/6/7/8/9/10/11/12/13/14/15/16/17	17	5	7
AD-DH	GRMZM2G316889	8	101429239	8.17591e-05	7.98427	Major facilitator superfamily protein		CCCCA/TCCCA/YCCYR/YMCYR/TCACA/CACTG/YCCCA/CCCTG/TCMCA/TCCTG/YCCCR/CACYR/CMMTG	1/2/3/4/5/6/7/8/9/10/11/12/13	13	5	16
ASI-WW	GRMZM2G104045	3	123151381	4.03797e-05	6.70246	Chaperone DnaJ-domain superfamily protein		RMMY/GAAT/ACCC	1/2/3	3	4	4
ASI-DS	AC208663.3_FG002	2	29926610	7.66816e-05	5.62625			GG/AC/RS/GS	1/2/3/4	4	2	2
ASI-DS	GRMZM5G863596	3	202948026	8.63265e-06	7.90765	Alpha-amylase-like 3		GCC/TTC/KYC/TTT/TTY/KYY/TYC	1/2/3/4/5/6/7	7	3	3
ASI-DS	GRMZM2G329229	5	194560176	4.86587e-06	10.2101	Aluminium activated malate transporter family protein	GY.HS	CTGAC/TCGGC/CTGGA/YYGRC/CTGGC/YYGGM/CTSGC/CTGRC/TTGGC/CTSRC/CTGGM/CCGGC/TCGGA/CCGRC/CTSGM/YTGGC/CYGGC/CTCGC/TCGGM/TTGRC/CTGRM/CTSGA	1/2/3/4/5/6/7/8/9/10/11/12/13/14/15/16/17/18/19/20/21/22	22	5	21
ASI-DS	GRMZM2G114113	5	199768082	4.47561e-05	9.13932			CGGTT/CCGTT/TGTGC/YGKKY/CGTGC/YGKTY/CGKKT/CGGGT/YGTGC/YGTKY/CSGTT/TGGTT/YGKGY	1/2/3/4/5/6/7/8/9/10/11/12/13	13	5	9
ASI-DS	GRMZM2G015352	6	1960870	1.473e-05	12.8654	Methyltransferase domain containing protein		CTGCG/CCGCT/CCGCG/TCACK/YYGCG/TCACG/YCGCG/CTACT/YCACG/CCRCG/CYRCG/TCGCT/TCGCG/CCACG/YYRYG/CTGTG/YCRCG/CYGCG/TCGTG/YCGCK/YCRYG/TCGYG/TCRCG/YYRCG/CTACG/CTRCG/CCGTG	1/2/3/4/5/6/7/8/9/10/11/12/13/14/15/16/17/18/19/20/21/22/23/24/25/26/27	27	5	6
ASI-DH	GRMZM2G066202	7	137518762	6.37925e-05	19.7065	Auxin-responsive family protein		GTCGA/CCCGG/STYAA/GTCGG/GTYGG/GYYGA/CTCRA/GTCAA/SYCRR/GTCRR/CTCAA/CTCGG/GTTAA/CCCGA/CTCGA/GCCGG/GTTGG/GCCGA/GYYRA/STCGR/GTCGR/SYCGA/GYCGR/STCRA/GYCRA	1/2/3/4/5/6/7/8/9/10/11/12/13/14/15/16/17/18/19/20/21/22/23/24/25	25	5	10
